# Supplementary material for: A Systems Biology Approach to Understanding the Mechanisms of Action of Chinese Herbs for Treatment of Cardiovascular Disease
Source: PubMed Central journal article supplement (PMC3497338; doi:10.3390/ijms131013501), 2012-10-19
Supplement: ijms-13-13501-s001.pdf [file ijms-13-13501-s001.pdf]

## Supplementary Information

**Table S1.** All 360 compounds in the three herbs and the corresponding predicted oral bioavailability (OB), and CAS number.

| No. | Molecule                                                              | CAS        | OB (%) | Herbs * |
|-----|-----------------------------------------------------------------------|------------|--------|---------|
| M1  | (-)-alpha-cubebene                                                    | 17699-14-8 | 32.62  | Lc      |
| M2  | (-)-beta-Elemene                                                      | 515-13-9   | 25.97  | Lc      |
| M3  | (-)-isolekene                                                         | 95910-36-4 | 53.02  | Lc      |
| M4  | (-)-p-mentha-1,5-diene                                                | 4221-98-1  | 26.62  | Lc      |
| M5  | (-)-spathulenol                                                       | 77171-55-2 | 27.88  | Lc      |
| M6  | (+)-alpha-funebrene                                                   | 50894-66-1 | 52.87  | Lc      |
| M7  | (1alpha,2beta,4beta)-1-methyl-2,4-bis(methylvinyl)-1-vinylcyclohexane | 33880-83-0 | 24.44  | Lc      |
| M8  | carotol                                                               | 465-28-1   | 149.03 | Lc      |
| M9  | (E,E)-undeca-1,3,5-triene                                             | 19883-29-5 | 18.18  | Lc      |
| M10 | (Z) -6,8',7,3'-diligustilide                                          | -          | 11.96  | Lc      |
| M11 | (Z,Z)-9,12-Octadecadien-1-ol                                          | 506-43-4   | 37.76  | Lc      |
| M12 | 1-(2-Hydroxy-5-methylphenyl)ethanone                                  | 1450-72-2  | 26.65  | Lc      |
| M13 | 1,1-Diethoxybutane                                                    | 3658-95-5  | 29.65  | Lc      |
| M14 | 1,1-dimethylcyclopentane                                              | 1638-26-2  | 41.22  | Lc      |
| M15 | 1,2,3,4,4a,7-Hexahydro-1,6-dimethyl-4-(1-methylethyl)-naphthalene     | -          | 19.06  | Lc      |
| M16 | 1,3,6-heptatriene,2,5,5-trimethyl-                                    | 29548-02-5 | 42.10  | Lc      |
| M17 | 1,3,8-p-Menthatriene                                                  | 18368-95-1 | 35.91  | Lc      |
| M18 | 1,5,5-Trimethyl-6-methylenecyclohexene                                | 514-95-4   | 46.08  | Lc      |
| M19 | 1-acetyl-2-phenylhydrazine                                            | 114-83-0   | 21.20  | Lc      |
| M20 | 1-Acetyl-carboline                                                    | 50892-83-6 | 67.12  | Lc      |
| M21 | 1-beta-ethylacrylate-7-aldehyde-beta-carboline                        | -          | 28.77  | Lc      |
| M22 | 1-Nonanal                                                             | 124-19-6   | 40.19  | Lc      |
| M23 | 1-Octanol,2,7-dimethyl-                                               | -          | 22.95  | Lc      |
| M24 | 1-propanone,1-[2-furanyl]-                                            | 3194-15-8  | 63.69  | Lc      |
| M25 | 1-propanone,1-phenyl-                                                 | 93-55-0    | 60.17  | Lc      |
| M26 | 1-Terpineol                                                           | 586-82-3   | 49.77  | Lc      |
| M27 | 2-(1-oxopentyl)-benzoic acid methyl ester                             | -          | 58.32  | Lc      |
| M28 | 2,2,3-trimethyl-3-cyclopentene-1-acetaldehyde                         | 4501-58-0  | 45.18  | Lc      |
| M29 | 2,2,3-Trimethylcyclopent-3-ene-1-carboxaldehyde                       | 33843-21-9 | 42.64  | Lc      |
| M30 | 2,3,5-trihydroxymethyl-6-methylpyrazine                               | -          | 73.44  | Lc      |
| M31 | 2-allyl-3,5,6-trimethylpyrazine                                       | -          | 29.82  | Lc      |
| M32 | 2-furancarboxylic acid,methyl ester                                   | 611-13-2   | 49.41  | Lc      |
| M33 | 2H-pyran-2-one,tetrahydro-5,6-dimethyl-,trans-                        | 24405-16-1 | 48.04  | Lc      |
| M34 | 2-hydroxymethyl-3,5,6-trimethyl-pyrazine                              | -          | 29.66  | Lc      |
| M35 | 2-Methoxy-4-vinylphenol                                               | 7786-61-0  | 41.30  | Lc      |
| M36 | 2-methyl benzoxazole                                                  | 95-21-6    | 65.68  | Lc      |
| M37 | 2-methyl-1-propenyl-benzene                                           | 768-49-0   | 34.96  | Lc      |
| M38 | 2-methyl-5-(1-methylene)-1,3-cyclohexadiene                           | -          | 40.99  | Lc      |
| M39 | 2-methyl-5-(1-methylethenyl)-2-cyclohexen-1-ol                        | 99-48-9    | 48.12  | Lc      |
| M40 | 2-methylhexane                                                        | 40626-78-6 | 59.94  | Lc      |
| M41 | 2-Pentyl-fura                                                         | 3777-69-3  | 54.53  | Lc      |
| M42 | 3(S)-3-Butyl-4,5-dihydrophthalide                                     | -          | 25.99  | Lc      |

|     |                                                       |             |        |    |
|-----|-------------------------------------------------------|-------------|--------|----|
| M43 | 3,4-Dihydroxybenzoic acid                             | 99-50-3     | 70.59  | Lc |
| M44 | 3,4-epoxy-2,2,7,7-tetramethyl-octane                  | -           | 24.21  | Lc |
| M45 | 3,5,6-trihydroxymethylpyrazine-2-methanoic-acid       | -           | 16.51  | Lc |
| M46 | 3,5,6-trimethylpyrazine-2-methanoic-acid              | -           | 37.96  | Lc |
| M47 | 3-carene                                              | 13466-78-9  | 45.15  | Lc |
| M48 | 3-cyclohexen-1-ol                                     | 822-66-2    | 70.52  | Lc |
| M49 | 3-furancarboxylic acid,methyl ester                   | 13129-23-2  | 77.82  | Lc |
| M50 | 3-methyl-6-(1-methylethyl)-2-cyclohexen-1-ol          | 491-04-3    | 47.88  | Lc |
| M51 | 3-methylene-6-(1-methylethyl)-cyclohexene             | 555-10-2    | 40.25  | Lc |
| M52 | 4-(1-Methylethyl)-1-cyclohexene-1-carboxaldehyde      | 21391-98-0  | 40.36  | Lc |
| M53 | 4,7-Dihydroxy-3-butylphthalide                        | -           | 105.83 | Lc |
| M54 | 4-hydroxy-3-butylphthalide                            | -           | 63.44  | Lc |
| M55 | 4-Iodoindoline                                        | 939759-03-2 | 27.36  | Lc |
| M56 | 4-octanone                                            | 589-63-9    | 19.37  | Lc |
| M57 | 5-hydroxymethyl-3,6-dimethylpyrazine-2-methanoic-acid | -           | 59.09  | Lc |
| M58 | 6-butyl-1,4-cycloheptadiene                           | 33156-91-1  | 31.51  | Lc |
| M59 | 1,4-Cineole                                           | 470-67-7    | 60.87  | Lc |
| M60 | Adenine                                               | 73-24-5     | 63.12  | Lc |
| M61 | Adenosine                                             | 58-61-7     | 10.03  | Lc |
| M62 | alpha-Bergamotene                                     | 17699-05-7  | 15.69  | Lc |
| M63 | alpha-Curcumene                                       | 644-30-4    | 23.87  | Lc |
| M64 | alpha-phellandrene                                    | 99-83-2     | 27.95  | Lc |
| M65 | alpha-pinene                                          | 80-56-8     | 46.25  | Lc |
| M66 | alpha-Selinene                                        | 473-13-2    | 31.85  | Lc |
| M67 | alpha-Terpinene                                       | 99-86-5     | 32.89  | Lc |
| M68 | Alpha-thujene                                         | 2867_05_2   | 48.66  | Lc |
| M69 | Amylbenzene                                           | 538-68-1    | 34.30  | Lc |
| M70 | aromadendrene oxide 2                                 | 85710-39-0  | 64.71  | Lc |
| M71 | aromadendrene,(+)                                     | 489-39-4    | 55.90  | Lc |
| M72 | augustic acid                                         | 26707-60-8  | 16.36  | Lc |
| M73 | benzene,1-ethyl-3-methyl-                             | 620-14-4    | 50.77  | Lc |
| M74 | benzyl alcohol                                        | 100-51-6    | 60.09  | Lc |
| M75 | beta-Acoradiene                                       | 28477-64-7  | 40.01  | Lc |
| M76 | beta-cubebene                                         | 13744-15-5  | 15.59  | Lc |
| M77 | beta-eudesmene                                        | 17066-67-0  | 23.65  | Lc |
| M78 | beta-Pinene                                           | 127-91-3    | 44.84  | Lc |
| M79 | beta-Scliene                                          | -           | 24.21  | Lc |
| M80 | beta-Sesquiphellandrene                               | 20307-83-9  | 17.47  | Lc |
| M81 | bicylogermacrene                                      | 24703-35-3  | 22.01  | Lc |
| M82 | Bornyl acetate                                        | 76-49-3     | 65.53  | Lc |
| M83 | Butanedioic acid, hydroxy-, dimethyl ester, (2R)-     | 70681-41-3  | 34.15  | Lc |
| M84 | butylidene phthalide                                  | 551-08-6    | 38.84  | Lc |
| M85 | Butylphthalide                                        | 6066-49-5   | 71.28  | Lc |
| M86 | Caffeic acid                                          | 331-39-5    | 26.00  | Lc |
| M87 | Camphene                                              | 79-92-5     | 35.05  | Lc |
| M88 | Cedrene                                               | 469-61-4    | 51.14  | Lc |
| M89 | chuanxingol                                           | 87421-30-5  | 36.49  | Lc |
| M90 | cis-Asarone                                           | 5273-86-9   | 47.30  | Lc |

|      |                                                             |             |       |    |
|------|-------------------------------------------------------------|-------------|-------|----|
| M91  | cis-Piperitol                                               | 16721-38-3  | 43.19 | Lc |
| M92  | cis-sabinenehydrate                                         | 546-79-2    | 94.32 | Lc |
| M93  | cnidilide                                                   | 3674-03-1   | 77.55 | Lc |
| M94  | Coniferylferulate                                           | 63644-62-2  | 4.54  | Lc |
| M95  | cyclodecene                                                 | 3618-12-0   | 47.89 | Lc |
| M96  | cyclohexane,1,1,2,3-tetramethyl-                            | 6783-92-2   | 48.08 | Lc |
| M97  | D(+)-Sucrose                                                | 57-50-1     | 3.10  | Lc |
| M98  | Decahydro-1, 6-bis(methylene)-4-(1-methylethyl)-naphthalene | 54932-90-0  | 28.34 | Lc |
| M99  | decane,2,9-dimethyl-                                        | 1002-17-1   | 16.76 | Lc |
| M100 | dihydroeugenol                                              | 2785-87-7   | 60.57 | Lc |
| M101 | D-Limonene                                                  | 138-86-3    | 37.40 | Lc |
| M102 | elemol                                                      | 639-99-6    | 30.49 | Lc |
| M103 | Ethyl linoleate                                             | 544-35-4    | 42.00 | Lc |
| M104 | eudesma-4,11-diene                                          | 17627-30-4  | 22.18 | Lc |
| M105 | ferulic acid                                                | 1135-24-6   | 86.58 | Lc |
| M106 | folic acid                                                  | 59-30-3     | 70.51 | Lc |
| M107 | frufural                                                    | 1998-01-1   | 35.26 | Lc |
| M108 | gamma-Bisabolene                                            | 495-62-5    | 18.50 | Lc |
| M109 | gamma-Terpinene                                             | 99-85-4     | 34.37 | Lc |
| M110 | Germacrene                                                  | -           | 16.42 | Lc |
| M111 | Germacrene D                                                | 37839-63-7  | 18.90 | Lc |
| M112 | globulol,(-)-                                               | 489-41-8    | 81.85 | Lc |
| M113 | Hendecanoic acid                                            | 112-37-8    | 30.25 | Lc |
| M114 | heptanal                                                    | 111-71-7    | 19.55 | Lc |
| M115 | Heptane                                                     | 142-82-5    | 41.80 | Lc |
| M116 | hexanophenone                                               | 942-92-7    | 51.63 | Lc |
| M117 | hinesol                                                     | 23811-08-7  | 37.90 | Lc |
| M118 | isopropyl phenyl ketone                                     | 611-70-1    | 80.39 | Lc |
| M119 | Levistolide-A                                               | 88182-33-6  | 9.48  | Lc |
| M120 | Ligustilide                                                 | 4431-01-0   | 50.10 | Lc |
| M121 | Ligustrazine                                                | 1124-11-4   | 29.64 | Lc |
| M122 | linalool                                                    | 78-70-6     | 39.51 | Lc |
| M123 | L-valyl-L-valine achydrate                                  | 350702-73-7 | 25.61 | Lc |
| M124 | Methyl eugenol                                              | 93-15-2     | 37.13 | Lc |
| M125 | Methyl linoleate                                            | 68605-14-1  | 41.93 | Lc |
| M126 | Methyl oleate                                               | 112-62-9    | 31.90 | Lc |
| M127 | Methyl palmitate                                            | 112-39-0    | 18.09 | Lc |
| M128 | methyl pentadecanoate                                       | 7132-64-1   | 11.22 | Lc |
| M129 | Myrcene                                                     | 123-35-3    | 19.01 | Lc |
| M130 | myricanone                                                  | 32492-74-3  | 59.78 | Lc |
| M131 | n-Caprylaldehyde                                            | 124-13-0    | 19.07 | Lc |
| M132 | neocnidilide                                                | 4567-33-3   | 28.88 | Lc |
| M133 | n-Hexanal                                                   | 66-25-1     | 55.71 | Lc |
| M134 | n-octatriacontane                                           | 7194-85-6   | 7.91  | Lc |
| M135 | octane                                                      | 111-65-9    | 29.72 | Lc |
| M136 | o-Cymene                                                    | 527-84-4    | 51.89 | Lc |
| M137 | Palmitic acid                                               | 1957-10-3   | 19.30 | Lc |
| M138 | p-cymene                                                    | 99-87-6     | 27.15 | Lc |

|      |                               |             |       |    |
|------|-------------------------------|-------------|-------|----|
| M139 | <i>p</i> -cymenol             | 1197-01-9   | 32.22 | Lc |
| M140 | pentadecane                   | 629-62-9    | 13.97 | Lc |
| M141 | Pentyl benzenemethanol        | -           | 55.76 | Lc |
| M142 | perlolirine                   | 29700-20-7  | 40.02 | Lc |
| M143 | <i>p</i> -menth-1-en-4-ol     | 20126-76-5  | 81.22 | Lc |
| M144 | <i>p</i> -mentha-1,4(8)-diene | 586-62-9    | 29.72 | Lc |
| M145 | pregnenolone                  | 145-13-1    | 35.67 | Lc |
| M146 | Sabinene                      | 3387-41-5   | 46.14 | Lc |
| M147 | sedanoic acid                 | 6697-07-0   | 44.45 | Lc |
| M148 | sedanolide                    | 6415-59-4   | 21.94 | Lc |
| M149 | Senkyunolide A                | 63038-10-8  | 26.69 | Lc |
| M150 | senkyunolide C                | 91652-78-7  | 39.45 | Lc |
| M151 | senkyunolide D                | 94530-82-2  | 83.37 | Lc |
| M152 | senkyunolide E                | 94530-83-3  | 18.53 | Lc |
| M153 | senkyunolide F                | 94530-84-4  | 40.39 | Lc |
| M154 | Senkyunolide G                | 94530-85-5  | 39.31 | Lc |
| M155 | Senkyunolide H                | 94596-27-7  | 20.64 | Lc |
| M156 | Senkyunolide I                | 94596-28-8  | 52.99 | Lc |
| M157 | senkyunolide J                | 94530-86-6  | 42.15 | Lc |
| M158 | Senkyunolide K                | 114569-33-4 | 61.86 | Lc |
| M159 | senkyunolide L                | 114586-51-5 | 30.19 | Lc |
| M160 | Senkyunolide M                | 114569-34-5 | 3.17  | Lc |
| M161 | Senkyunolide N                | 140694-58-2 | 36.62 | Lc |
| M162 | Senkyunolide O                | 142797-35-1 | 10.14 | Lc |
| M163 | Senkyunolide P                | 142864-23-1 | 9.22  | Lc |
| M164 | Senkyunolide Q                | 142235-81-2 | 19.41 | Lc |
| M165 | Senkyunolide R                | 172549-37-0 | 21.38 | Lc |
| M166 | senkyunolide S                | -           | 17.01 | Lc |
| M167 | senkyunone                    | 142182-61-4 | 47.66 | Lc |
| M168 | sinapic acid                  | 530-59-6    | 10.67 | Lc |
| M169 | spathulenol                   | 6750-60-3   | 82.37 | Lc |
| M170 | Stearic acid                  | 1957-11-4   | 17.83 | Lc |
| M171 | Terpinen-4-ol                 | 562-74-3    | 81.22 | Lc |
| M172 | terpineol                     | 8000-41-7   | 46.62 | Lc |
| M173 | tetradecane                   | 629-59-4    | 15.93 | Lc |
| M174 | thymol                        | 89-83-8     | 44.03 | Lc |
| M175 | trans-2-Nonen-1-ol            | 31502-14-4  | 19.93 | Lc |
| M176 | trans-ocimene                 | 6874-10-8   | 22.24 | Lc |
| M177 | trans-Piperitol               | 25437-28-9  | 47.52 | Lc |
| M178 | trimethylamine                | 75-50-3     | 59.98 | Lc |
| M179 | uracil                        | 66-22-8     | 42.53 | Lc |
| M180 | Valerophenone                 | 1009-14-9   | 42.58 | Lc |
| M181 | Vanillin                      | 121-33-5    | 52.85 | Lc |
| M182 | Verbenene                     | 4080-46-0   | 37.71 | Lc |
| M183 | wallichilide                  | 93236-64-7  | 5.05  | Lc |
| M184 | xiongterpene                  | -           | 8.58  | Lc |
| M185 | Z-butylidenephthalide         | 551-08-6    | 41.80 | Lc |
| M186 | Z-Neo-allo-ocimene            | 673-84-7    | 14.89 | Lc |

|      |                                                                                                                                   |             |       |    |
|------|-----------------------------------------------------------------------------------------------------------------------------------|-------------|-------|----|
| M187 | caryophyllene                                                                                                                     | 6753-98-6   | 24.77 | Lc |
| M188 | farnesene                                                                                                                         | 502-61-4    | 7.94  | Lc |
| M189 | palmitic acid ethyl ester                                                                                                         | 628-97-7    | 18.99 | Lc |
| M190 | beta-Sitosterol                                                                                                                   | 83-46-5     | 36.91 | Lc |
| M191 | daucosterol                                                                                                                       | 474-58-8    | 20.63 | Lc |
| M192 | linoleic acid                                                                                                                     | 60-33-3     | 41.90 | Lc |
| M193 | oleic acid                                                                                                                        | 112-80-1    | 33.13 | Lc |
| M194 | Vanillic acid                                                                                                                     | 121-34-6    | 64.27 | Lc |
| M195 | (3 <i>R</i> )-4'-methoxy-2',3,7-trihydroxyisoflavanone                                                                            | -           | 43.11 | Do |
| M196 | (3 <i>R</i> )-5'-methoxyvestitol                                                                                                  | -           | 4.20  | Do |
| M197 | (3 <i>R</i> )-7,2',3'-trihydroxy-4-methoxyisoflavan                                                                               | -           | 57.20 | Do |
| M198 | (3 <i>R</i> )-vestitol                                                                                                            | 35878-41-2  | 71.33 | Do |
| M199 | (3 <i>R</i> ,4 <i>R</i> )-2',3',7-trihydroxy-4'-methoxy-4-[(3 <i>R</i> )-2',7-dihydroxy-4'-methoxyisoflav<br>van-5'-yl]-isoflavan | -           | 2.41  | Do |
| M200 | (3 <i>R</i> ,4 <i>R</i> )-2',7-dihydroxy-4',5'-dimethoxy-4-[(3 <i>R</i> )-2',7-dihydroxy-4'-methoxyisof<br>lavan-5'-yl]isoflavan  | -           | 24.37 | Do |
| M201 | (3 <i>R</i> ,4 <i>R</i> )-3',7-dihydroxy-2',4'-dimethoxy-4-[(2 <i>S</i> )-4',5,7-trihydroxyflavanone-6-y<br>l]isoflavan           | -           | 39.93 | Do |
| M202 | (3 <i>R</i> ,4 <i>R</i> )-3',7-dihydroxy-2',4'-dimethoxy-4-[(3 <i>R</i> )-2',7-dihydroxy-4'-methoxyisof<br>lavan-5'-yl]isoflavan  | -           | 1.29  | Do |
| M203 | ( <i>R</i> )-3-(2,3-dihydroxy-4-methoxyphenyl)-7-hydroxychroman-4-one                                                             | 122587-88-6 | 48.27 | Do |
| M204 | ( <i>R</i> )-3-(2,3-dihydroxy-4-methoxyphenyl)chroman-7,8-diol                                                                    | 122587-87-5 | 37.53 | Do |
| M205 | ( <i>E</i> )-3,8-nonadien-2-one                                                                                                   | 55282-90-1  | 19.74 | Do |
| M206 | ( <i>E</i> )-beta-farnesene                                                                                                       | 18794-84-8  | 7.57  | Do |
| M207 | 1,2,4-trimethylcyclohexane                                                                                                        | 2234-75-5   | 44.68 | Do |
| M208 | 1-Butanol                                                                                                                         | 71-36-3     | 91.11 | Do |
| M209 | 2,2,6-trimethyl-6-vinyltetrahydro-2h-pyran-3-ol                                                                                   | 14049-11-7  | 43.09 | Do |
| M210 | 2,3-didehydro-2',7-dihydroxy-4'-methoxy-3(2',7-dihydroxy-4'-methoxyisoflava<br>n-5'-yl)flavan                                     | -           | 32.35 | Do |
| M211 | 2,3-didehydro-2',7-dihydroxy-4'-methoxy-3-(2',7-dihydroxy-4'-methoxyisoflav<br>an-5'-yl)flavone                                   | -           | 1.25  | Do |
| M212 | 2,3-didehydro-2',7-dihydroxy-4'-methoxy-3(2',7-dihydroxy-4'-methoxyisoflava<br>n-6-yl)flavan                                      | -           | 1.22  | Do |
| M213 | 2,4-dihydroxy-5-methoxybenzophenone                                                                                               | -           | 44.19 | Do |
| M214 | 2,4-dihydroxy-5-methoxyphenylmethanone                                                                                            | -           | 39.54 | Do |
| M215 | 2,4-dimethyl-2,4-heptadienal                                                                                                      | 42452-48-2  | 57.48 | Do |
| M216 | 2,4-dimethyl-2,6-heptadienal                                                                                                      | 80192-48-9  | 58.28 | Do |
| M217 | 2',6-dihydroxy-4'-methoxy-2-arylbenzofuran                                                                                        | -           | 67.09 | Do |
| M218 | 2-Methyl-6-hydroxyquinoline                                                                                                       | 613-21-8    | 45.02 | Do |
| M219 | 2'- <i>O</i> -methylisoliquiritigenin                                                                                             | 51828-10-5  | 79.15 | Do |
| M220 | 3',4',7-Trihydroxyflavone                                                                                                         | 2150-11-0   | 67.84 | Do |
| M221 | 3-hydroxy-9-methoxy-coumestan                                                                                                     | 1690-62-6   | 37.39 | Do |
| M222 | 3'-hydroxymelanettin                                                                                                              | 200391-95-3 | 31.26 | Do |
| M223 | 3'-methoxydaidzein                                                                                                                | 21913-98-4  | 5.37  | Do |
| M224 | 3-methoxypyridazine                                                                                                               | 19064-65-4  | 23.87 | Do |
| M225 | 3'- <i>O</i> -methylviolanonone                                                                                                   | 56973-42-3  | 49.75 | Do |
| M226 | 4',5',7-trimethyl-3-methoxyflavone                                                                                                | -           | 25.94 | Do |
| M227 | 4-methoxydalbergione                                                                                                              | 28396-75-0  | 38.14 | Do |

|      |                                                          |             |       |    |
|------|----------------------------------------------------------|-------------|-------|----|
| M228 | 4-Methyl-4-hydroxycyclohexanone                          | 17429-02-6  | 70.25 | Do |
| M229 | 6,10,14-trimethyl-2-pentadecanone                        | 502-69-2    | 7.35  | Do |
| M230 | 7-hydroxy-4'-methoxy-2',5'-dioxo-4-                      | -           | 0.82  | Do |
| M231 | 9-Oxonerolidol                                           | 58865-88-6  | 61.78 | Do |
| M232 | alpha-bisabolol                                          | 515-69-5    | 34.65 | Do |
| M233 | alpha-santalol                                           | 115-71-9    | 32.79 | Do |
| M234 | Alpinetin                                                | 1090-65-9   | 49.63 | Do |
| M235 | Benzaldehyde                                             | 100-52-7    | 32.63 | Do |
| M236 | benzofuran                                               | 271-89-6    | 34.85 | Do |
| M237 | benzothiazole                                            | 95-16-9     | 70.84 | Do |
| M238 | beta-angelialacton/5-Methyl-2(5H)-furanone               | 591-11-7    | 64.19 | Do |
| M239 | beta-bisabolene                                          | 495-61-4    | 29.47 | Do |
| M240 | bowdichione                                              | 53774-75-7  | 43.19 | Do |
| M241 | butein                                                   | 21849-70-7  | 78.38 | Do |
| M242 | butin                                                    | 492-14-8    | 52.91 | Do |
| M243 | caryophyllene oxide                                      | 1139-30-6   | 31.64 | Do |
| M244 | cearoin                                                  | 52811-37-7  | 47.34 | Do |
| M245 | chalcone                                                 | 94-41-7     | 51.22 | Do |
| M246 | clausseguinone                                           | 35878-39-8  | 60.89 | Do |
| M247 | dalbergin                                                | 482-83-7    | 78.57 | Do |
| M248 | dihydrolinalool                                          | 18479-49-7  | 25.42 | Do |
| M249 | D-nerolidol                                              | 142-50-7    | 38.91 | Do |
| M250 | duartin                                                  | 52305-04-1  | 61.17 | Do |
| M251 | Eriodictyol                                              | 552-58-9    | 54.77 | Do |
| M252 | eucalyptol                                               | 470-82-6    | 39.73 | Do |
| M253 | formononetin                                             | 485-72-3    | 23.44 | Do |
| M254 | geranylaceton                                            | 3796-70-1   | 18.69 | Do |
| M255 | Guaiacol                                                 | 90-05-1     | 48.79 | Do |
| M256 | hydroxyobtustyrene                                       | 101153-43-9 | 78.44 | Do |
| M257 | indole                                                   | 120-72-9    | 34.38 | Do |
| M258 | isoduartin                                               | 101153-40-6 | 3.70  | Do |
| M259 | isoliquiritigenin                                        | 961-29-5    | 61.38 | Do |
| M260 | isomucronustyrene                                        | 69471-12-1  | 78.92 | Do |
| M261 | Koparin                                                  | 65048-75-1  | 68.87 | Do |
| M262 | liquiritigenin                                           | 578-86-9    | 67.19 | Do |
| M263 | medicarpin                                               | 32383-76-9  | 76.02 | Do |
| M264 | Melilotocarpin A                                         | 61135-95-3  | 87.37 | Do |
| M265 | melilotocarpin C                                         | 83013-82-5  | 78.88 | Do |
| M266 | melilotocarpin D                                         | 83013-81-4  | 39.35 | Do |
| M267 | methyl 2-hydroxy-3,4-dimethoxybenzoate                   | 6395-23-9   | 89.23 | Do |
| M268 | Methylnissolin                                           | 73340-41-7  | 66.53 | Do |
| M269 | mucronulatol                                             | 20878-98-2  | 64.93 | Do |
| M270 | Myristic acid                                            | 544-63-8    | 14.24 | Do |
| M271 | naringenin                                               | 480-41-1    | 41.08 | Do |
| M272 | n-hexadecanoic acid                                      | 57-10-3     | 19.30 | Do |
| M273 | obtustyrene                                              | 21148-31-2  | 8.46  | Do |
| M274 | odoricarpin                                              | 101153-42-8 | 60.17 | Do |
| M275 | odoriflavene/7,2'-Dihydroxy-3',4'-dimethoxyisoflav-3-ene | 101153-41-7 | 84.49 | Do |

|      |                             |             |       |    |
|------|-----------------------------|-------------|-------|----|
| M276 | Phenol                      | 108-95-2    | 36.05 | Do |
| M277 | phytol                      | 102608-53-7 | 33.82 | Do |
| M278 | pinene                      | 80-56-8     | 46.20 | Do |
| M279 | pinocembrin                 | 68745-38-0  | 45.43 | Do |
| M280 | prunetin                    | 552-59-0    | 43.44 | Do |
| M281 | sativanone                  | 70561-31-8  | 73.01 | Do |
| M282 | Stevein                     | 36286-69-8  | 40.29 | Do |
| M283 | Styrene                     | 100-42-5    | 29.55 | Do |
| M284 | Turmerol                    | 82508-15-4  | 48.49 | Do |
| M285 | Vestitone                   | 66211-83-4  | 78.21 | Do |
| M286 | vistitone                   | 52250-38-1  | 71.83 | Do |
| M287 | Xenognosin B                | 1890-99-9   | 73.99 | Do |
| M288 | (-)-alpha-N-methylcanadine  | 47474-49-7  | 50.94 | Cy |
| M289 | (-)-scoulerine              | 6451-73-6   | 37.28 | Cy |
| M290 | (S)-Isocorypalmine          | 483-34-1    | 35.80 | Cy |
| M291 | 10-nonacosanol              | 2606-50-0   | 11.33 | Cy |
| M292 | 13-methyldehydrocorydalmine | -           | 72.22 | Cy |
| M293 | 13-methylpalmatrubine       | -           | 70.97 | Cy |
| M294 | Acetylcorynoline            | 18797-80-3  | 28.54 | Cy |
| M295 | alpha-allocryptopine        | 24240-04-8  | 47.39 | Cy |
| M296 | berberine                   | 2086-83-1   | 39.61 | Cy |
| M297 | bicuculline                 | 485-49-4    | 76.96 | Cy |
| M298 | Bulbocapnine                | 298-45-3    | 54.81 | Cy |
| M299 | Canadine                    | 522-97-4    | 47.27 | Cy |
| M300 | Capaurine                   | 478-14-8    | 71.12 | Cy |
| M301 | caseanidine                 | 40141-47-7  | 93.87 | Cy |
| M302 | cavidine                    | 32728-75-9  | 26.21 | Cy |
| M303 | clarkeanidine               | 99615-99-3  | 92.55 | Cy |
| M304 | columbamine                 | 3621-36-1   | 35.41 | Cy |
| M305 | coptisine                   | 3486-66-6   | 51.92 | Cy |
| M306 | corybulbine                 | 518-77-4    | 30.11 | Cy |
| M307 | corydaline                  | 518-69-4    | 26.35 | Cy |
| M308 | Corydalmine                 | 30413-84-4  | 7.89  | Cy |
| M309 | Corydine                    | 476-69-7    | 26.81 | Cy |
| M310 | corynoline                  | 18797-79-0  | 31.25 | Cy |
| M311 | Corynoxine                  | 31470-65-2  | 68.61 | Cy |
| M312 | coryphenanthrine            | 66190-61-2  | 61.15 | Cy |
| M313 | Corytuberine                | 517-56-6    | 30.46 | Cy |
| M314 | cryptopine                  | 482-74-6    | 26.77 | Cy |
| M315 | d-(+)-tetrahydropalmatine   | 3520-14-7   | 49.80 | Cy |
| M316 | dehydrocavidine             | 83218-34-2  | 47.59 | Cy |
| M317 | Dehydrocorybulbine          | -           | 10.22 | Cy |
| M318 | dehydrocorydaline           | 30045-16-0  | 60.36 | Cy |
| M319 | Dehydrocorydalmine          | 6877-27-6   | 10.17 | Cy |
| M320 | dehydroglaucine             | -           | 29.09 | Cy |
| M321 | dehydronantenine            | 98-15-2     | 41.01 | Cy |
| M322 | demethylcorydalmine         | -           | 39.23 | Cy |
| M323 | Dihydrochelerythrine        | 6880-91-7   | 30.80 | Cy |

|      |                           |             |       |    |
|------|---------------------------|-------------|-------|----|
| M324 | Dihydrosanguinarine       | 3606-45-9   | 46.95 | Cy |
| M325 | Docosanoic acid           | 112-85-6    | 15.69 | Cy |
| M326 | Emodin                    | 518-82-1    | 24.54 | Cy |
| M327 | Emodin-3-methyl ether     | 521-61-9    | 18.59 | Cy |
| M328 | Fumaricicine              | 24181-77-9  | 43.85 | Cy |
| M329 | glaucine                  | 475-81-0    | 23.27 | Cy |
| M330 | hydroxystreptomycin       | 6835-00-3   | 0.41  | Cy |
| M331 | isoboldine                | 3019-51-0   | 31.06 | Cy |
| M332 | isocorybulbine            | 22672-74-8  | 42.04 | Cy |
| M333 | leonticine                | 2609-29-2   | 49.00 | Cy |
| M334 | lirioferine               | 6883-42-7   | 14.98 | Cy |
| M335 | Mecambridine              | 31098-60-9  | 24.84 | Cy |
| M336 | nantenine                 | 2565-01-7   | 14.29 | Cy |
| M337 | N-methylaurotetanine      | 2169-44-0   | 28.47 | Cy |
| M338 | norglaucine               | 21848-62-4  | 61.25 | Cy |
| M339 | noroxyhydrastinine        | 21796-14-5  | 39.93 | Cy |
| M340 | oxoglaucine               | 5574-24-3   | 23.76 | Cy |
| M341 | palmatine                 | 3486-67-7   | 29.55 | Cy |
| M342 | p-hydroxybenzoic acid     | 99-96-7     | 43.75 | Cy |
| M343 | pontevedrine              | 34647-65-9  | 26.97 | Cy |
| M344 | protopine                 | 130-86-9    | 5.20  | Cy |
| M345 | pseudocoptisine           | 19716-67-7  | 41.53 | Cy |
| M346 | pseudoprotopine           | 24240-05-9  | 63.63 | Cy |
| M347 | quercetin                 | 117-39-5    | 45.91 | Cy |
| M348 | sanguidimerine            | 41758-45-6  | 28.76 | Cy |
| M349 | sanguinarine              | 2447-54-3   | 43.04 | Cy |
| M350 | saulatine                 | 91897-61-9  | 51.80 | Cy |
| M351 | spallidamine              | 129388-65-4 | 4.84  | Cy |
| M352 | stigmasterol              | 83-48-7     | 9.73  | Cy |
| M353 | stylopine                 | 7461-02-1   | 54.12 | Cy |
| M354 | tetrahydrocoptisine       | 4312-32-7   | 54.12 | Cy |
| M355 | Tetrahydrocorysamine      | 32043-26-8  | 38.40 | Cy |
| M356 | tetrahydropalmatine       | 10097-84-4  | 75.78 | Cy |
| M357 | tetrahydroprotopapaverine | 26193-25-9  | 64.29 | Cy |
| M358 | thalicmidine              | 5083-88-5   | 26.44 | Cy |
| M359 | Yuanamide                 | 102421-42-1 | 44.66 | Cy |
| M360 | yuanhunine                | 104387-15-7 | 84.94 | Cy |

\* *Ligusticum chuanxiong* (Lc), *Dalbergia odorifera*(Do) and *Corydalis yanhusuo*(Cy)

**Table S2.** The information of all 261 protein targets.

| No.    | Protein name                                                                   |
|--------|--------------------------------------------------------------------------------|
| P4 *   | Voltage-dependent L-type calcium channel subunit alpha-1C                      |
| P8 *   | Tyrosine-protein phosphatase non-receptor type 1                               |
| P9 *   | Tyrosine-protein kinase JAK2                                                   |
| P10 *  | Tumor necrosis factor                                                          |
| P25 *  | Sodium channel protein type 4 subunit alpha                                    |
| P28 *  | Serine/threonine-protein kinase Chk1                                           |
| P34 *  | Retinoic acid receptor gamma-1                                                 |
| P35 *  | Renin                                                                          |
| P41 *  | Proto-oncogene tyrosine-protein kinase Src                                     |
| P45 *  | Prothrombin                                                                    |
| P46 *  | Prostaglandin G/H synthase 2                                                   |
| P47 *  | Prostaglandin G/H synthase 1                                                   |
| P51 *  | Potassium voltage-gated channel subfamily H member 2                           |
| P53 *  | Phospholipase A2, membrane associated                                          |
| P55 *  | Phosphatidylinositol-4,5-bisphosphate 3-kinase catalytic subunit gamma isoform |
| P57 *  | Peroxisome proliferator-activated receptor gamma                               |
| P58 *  | Peroxisome proliferator-activated receptor delta                               |
| P59 *  | Peroxisome proliferator-activated receptor alpha                               |
| P63 *  | Orphan nuclear receptor PXR                                                    |
| P66 *  | Nitric-oxide synthase, endothelial                                             |
| P68 *  | Nitric oxide synthase, inducible                                               |
| P72 *  | Neuronal acetylcholine receptor subunit alpha-7                                |
| P75 *  | Neuronal acetylcholine receptor subunit alpha-3                                |
| P79 *  | NAD(P)H dehydrogenase [quinone] 1                                              |
| P98 *  | Leukotriene A-4 hydrolase                                                      |
| P108 * | Heat shock protein HSP 90-alpha                                                |
| P110 * | Glycogen synthase kinase-3 beta                                                |
| P111 * | Glycogen phosphorylase, muscle form                                            |
| P116 * | Glucocorticoid receptor                                                        |
| P134 * | FK506-binding protein 1A                                                       |
| P136 * | Estrogen receptor beta                                                         |
| P137 * | Estrogen receptor                                                              |
| P150 * | Delta-type opioid receptor                                                     |
| P167 * | Coagulation factor X                                                           |
| P168 * | Coagulation factor VII                                                         |
| P175 * | cGMP-specific 3',5'-cyclic phosphodiesterase                                   |
| P176 * | cGMP-inhibited 3',5'-cyclic phosphodiesterase A                                |
| P183 * | Catechol O-methyltransferase                                                   |
| P184 * | Caspase-3                                                                      |
| P186 * | Carboxypeptidase B                                                             |
| P187 * | Carbonic anhydrase 7                                                           |
| P188 * | Carbonic anhydrase 4                                                           |
| P193 * | cAMP-specific 3',5'-cyclic phosphodiesterase 4A                                |
| P203 * | Beta-1 adrenergic receptor                                                     |
| P208 * | Arachidonate 5-lipoxygenase                                                    |

---

|        |                                                           |
|--------|-----------------------------------------------------------|
| P209 * | Angiotensin-converting enzyme                             |
| P210 * | Androgen receptor                                         |
| P216 * | Alpha-2A adrenergic receptor                              |
| P217 * | Alpha-1D adrenergic receptor                              |
| P226 * | Adenosine A1 receptor                                     |
| P252 * | Coagulation factor XI                                     |
| P260 * | ATP-sensitive inward rectifier potassium channel 11       |
| P261 * | Translocator protein                                      |
| P262 * | Hemoglobin subunit beta                                   |
| P1     | Voltage-dependent T-type calcium channel subunit alpha-1I |
| P2     | Voltage-dependent T-type calcium channel subunit alpha-1G |
| P3     | Voltage-dependent L-type calcium channel subunit alpha-1S |
| P5     | Voltage-dependent calcium channel subunit alpha-2/delta-1 |
| P6     | Vitamin K epoxide reductase complex subunit 1             |
| P7     | Urokinase-type plasminogen activator                      |
| P11    | Trypsin-3                                                 |
| P12    | Trypsin-1                                                 |
| P13    | Trace amine-associated receptor 1                         |
| P14    | Thyroid hormone receptor beta-1                           |
| P15    | Thymidylate synthase                                      |
| P16    | Thymidine kinase                                          |
| P17    | Thermolysin                                               |
| P18    | Synaptic vesicular amine transporter                      |
| P19    | Stromelysin-1                                             |
| P20    | Streptavidin                                              |
| P21    | Sodium-dependent serotonin transporter                    |
| P22    | Sodium-dependent noradrenaline transporter                |
| P23    | Sodium-dependent dopamine transporter                     |
| P24    | Sodium channel protein type 5 subunit alpha               |
| P26    | Sodium channel protein type 10 subunit alpha              |
| P27    | Sigma 1-type opioid receptor                              |
| P29    | Serine/threonine-protein kinase 6                         |
| P30    | Serine protease hepsin                                    |
| P31    | Salivary alpha-amylase                                    |
| P32    | Ribosyldihyronicotinamide dehydrogenase [quinone]         |
| P33    | Retinoic acid receptor RXR-beta                           |
| P36    | Reaction center protein M chain                           |
| P37    | Reaction center protein L chain                           |
| P38    | Queuine tRNA-ribosyltransferase                           |
| P40    | Purine nucleoside phosphorylase                           |
| P42    | Proto-oncogene tyrosine-protein kinase LCK                |
| P43    | Proto-oncogene tyrosine-protein kinase ABL1               |
| P44    | Proto-oncogene serine/threonine-protein kinase Pim-1      |
| P48    | Progesterone receptor                                     |
| P49    | Potassium voltage-gated channel subfamily H member 7      |
| P50    | Potassium voltage-gated channel subfamily H member 6      |
| P52    | POSSIBLE CELLULASE CELA1                                  |
| P54    | Phospholipase A2                                          |

---

---

|      |                                                                        |
|------|------------------------------------------------------------------------|
| P56  | Phenylethanolamine N-methyltransferase                                 |
| P60  | Pepsin A                                                               |
| P61  | Pancreatic alpha-amylase                                               |
| P62  | P2Y purinoceptor 12                                                    |
| P64  | Nuclear receptor coactivator 2                                         |
| P65  | Nuclear receptor coactivator 1                                         |
| P67  | Nitric-oxide synthase, brain                                           |
| P69  | Nicotinate-nucleotide--dimethylbenzimidazole phosphoribosyltransferase |
| P70  | Neutrophil gelatinase-associated lipocalin                             |
| P71  | Neutrophil collagenase                                                 |
| P73  | Neuronal acetylcholine receptor subunit alpha-6                        |
| P74  | Neuronal acetylcholine receptor subunit alpha-4                        |
| P76  | Neuronal acetylcholine receptor subunit alpha-2                        |
| P77  | Neuronal acetylcholine receptor subunit alpha-10                       |
| P78  | Neuraminidase                                                          |
| P80  | Mu-type opioid receptor                                                |
| P81  | Muscarinic acetylcholine receptor M5                                   |
| P82  | Muscarinic acetylcholine receptor M4                                   |
| P83  | Muscarinic acetylcholine receptor M3                                   |
| P84  | Muscarinic acetylcholine receptor M2                                   |
| P85  | Muscarinic acetylcholine receptor M1                                   |
| P86  | Mitogen-activated protein kinase 8                                     |
| P87  | Mitogen-activated protein kinase 14                                    |
| P88  | Mitogen-activated protein kinase 10                                    |
| P89  | Mitogen-activated protein kinase 1                                     |
| P90  | Methionine aminopeptidase 2                                            |
| P91  | Methionine aminopeptidase                                              |
| P92  | Matrix protein 2                                                       |
| P93  | Matrix metalloproteinase-9                                             |
| P94  | MAP kinase-activated protein kinase 2                                  |
| P95  | Macrophage migration inhibitory factor                                 |
| P96  | Macrophage metalloelastase                                             |
| P97  | Lysozyme                                                               |
| P99  | Lactotransferrin                                                       |
| P100 | Kinesin-like protein KIF11                                             |
| P101 | Kappa-type opioid receptor                                             |
| P102 | Ig kappa chain C region                                                |
| P103 | Ig gamma-2 chain C region                                              |
| P104 | Ig gamma-1 chain C region                                              |
| P105 | Hypoxanthine-guanine phosphoribosyltransferase                         |
| P106 | Histamine H1 receptor                                                  |
| P107 | Heat shock protein HSP 90-beta                                         |
| P109 | Group IIE secretory phospholipase A2                                   |
| P112 | Glutathione-requiring prostaglandin D synthase                         |
| P113 | Glutamate receptor, ionotropic kainate 2                               |
| P114 | Glutamate receptor 2                                                   |
| P115 | Glutamate [NMDA] receptor subunit 3A                                   |
| P117 | Glucan 1,4-alpha-maltohexaosidase                                      |

---

---

|      |                                                  |
|------|--------------------------------------------------|
| P118 | Glucan 1,3-beta-glucosidase                      |
| P119 | Genome polyprotein                               |
| P120 | Gamma-aminobutyric-acid receptor subunit beta-3  |
| P121 | Gamma-aminobutyric-acid receptor subunit beta-2  |
| P122 | Gamma-aminobutyric-acid receptor subunit alpha-6 |
| P123 | Gamma-aminobutyric-acid receptor subunit alpha-5 |
| P124 | Gamma-aminobutyric-acid receptor subunit alpha-4 |
| P125 | Gamma-aminobutyric-acid receptor subunit alpha-3 |
| P126 | Gamma-aminobutyric-acid receptor subunit alpha-2 |
| P127 | Gamma-aminobutyric-acid receptor subunit alpha-1 |
| P128 | Gamma-aminobutyric acid receptor subunit gamma-3 |
| P129 | Gamma-aminobutyric acid receptor subunit gamma-2 |
| P130 | Gamma-aminobutyric acid receptor subunit gamma-1 |
| P131 | Gamma-aminobutyric acid receptor subunit epsilon |
| P132 | Gag-Pol polyprotein                              |
| P133 | Fructose-1,6-bisphosphatase 1                    |
| P135 | Estrogen-related receptor gamma                  |
| P138 | Ephrin type-B receptor 4                         |
| P139 | Eosinophil lysophospholipase                     |
| P140 | Enoyl-[acyl-carrier-protein] reductase [NADH]    |
| P141 | Endothelin-1 receptor                            |
| P142 | Endoglucanase G                                  |
| P143 | Endoglucanase 5A                                 |
| P144 | DNA topoisomerase 2-alpha                        |
| P145 | DNA topoisomerase 1                              |
| P146 | Dipeptidyl peptidase 4                           |
| P147 | Dihydroorotate dehydrogenase, mitochondrial      |
| P148 | Dihydrofolate reductase-like protein 1           |
| P149 | Dihydrofolate reductase                          |
| P151 | D-amino-acid oxidase                             |
| P152 | D(4) dopamine receptor                           |
| P153 | D(3) dopamine receptor                           |
| P154 | D(2) dopamine receptor                           |
| P155 | D(1B) dopamine receptor                          |
| P156 | D(1A) dopamine receptor                          |
| P157 | Cytochrome P450-cam                              |
| P158 | Cytochrome c1, heme protein, mitochondrial       |
| P159 | Cytochrome b-c1 complex subunit 8                |
| P160 | Cytochrome b-c1 complex subunit 6, mitochondrial |
| P161 | Cytochrome b                                     |
| P162 | Cysteinyl leukotriene receptor 1                 |
| P163 | Cyclomaltodextrin glucanotransferase             |
| P164 | Cyclin-A2                                        |
| P165 | Corticosteroid 11-beta-dehydrogenase isozyme 1   |
| P166 | Collagenase 3                                    |
| P169 | Chymotrypsinogen B                               |
| P170 | Chymotrypsin-like elastase family member 1       |
| P171 | CHRNA7-FAM7A fusion protein                      |

---

---

|      |                                                        |
|------|--------------------------------------------------------|
| P172 | Cholinesterase                                         |
| P173 | Chitinase B                                            |
| P174 | Chitinase                                              |
| P177 | Cell division protein kinase 5                         |
| P178 | Cell division protein kinase 2                         |
| P179 | Cathepsin S                                            |
| P180 | Cathepsin K                                            |
| P181 | Cathepsin D                                            |
| P182 | Cathepsin B                                            |
| P185 | Casein kinase II subunit alpha                         |
| P189 | Carbonic anhydrase 2                                   |
| P190 | Carbonic anhydrase 1                                   |
| P191 | cAMP-specific 3',5'-cyclic phosphodiesterase 4D        |
| P192 | cAMP-specific 3',5'-cyclic phosphodiesterase 4B        |
| P194 | cAMP-dependent protein kinase inhibitor alpha          |
| P195 | cAMP-dependent protein kinase catalytic subunit alpha  |
| P196 | Calmodulin                                             |
| P197 | B-Raf proto-oncogene serine/threonine-protein kinase   |
| P198 | Beta-secretase 1                                       |
| P199 | Beta-lactamase TEM                                     |
| P200 | Beta-lactamase                                         |
| P201 | Beta-glucosidase A                                     |
| P202 | Beta-2 adrenergic receptor                             |
| P204 | Basic fibroblast growth factor receptor 1              |
| P205 | Bacillolysins                                          |
| P206 | ATP-binding cassette transporter sub-family C member 8 |
| P207 | Aralkylamine dehydrogenase light chain                 |
| P211 | Amine oxidase [flavin-containing] B                    |
| P212 | Amine oxidase [flavin-containing] A                    |
| P213 | Alpha-7 nicotinic cholinergic receptor subunit         |
| P214 | Alpha-2C adrenergic receptor                           |
| P215 | Alpha-2B adrenergic receptor                           |
| P218 | Alpha-1B adrenergic receptor                           |
| P219 | Alpha-1A adrenergic receptor                           |
| P220 | Aldose reductase                                       |
| P221 | Alcohol dehydrogenase 1C                               |
| P222 | Alcohol dehydrogenase 1B                               |
| P223 | Alcohol dehydrogenase 1A                               |
| P224 | Adenosine deaminase                                    |
| P225 | Adenosine A2a receptor                                 |
| P227 | Acetylcholinesterase                                   |
| P228 | 5-hydroxytryptamine 4 receptor                         |
| P229 | 5-hydroxytryptamine 3 receptor                         |
| P230 | 5-hydroxytryptamine 2C receptor                        |
| P231 | 5-hydroxytryptamine 2B receptor                        |
| P232 | 5-hydroxytryptamine 2A receptor                        |
| P233 | 5-hydroxytryptamine 1E receptor                        |
| P234 | 5-hydroxytryptamine 1D receptor                        |

---

---

|      |                                                           |
|------|-----------------------------------------------------------|
| P235 | 5-hydroxytryptamine 1B receptor                           |
| P236 | 5-hydroxytryptamine 1A receptor                           |
| P237 | 3-phosphoinositide-dependent protein kinase 1             |
| P238 | (3R)-hydroxymyristoyl-acyl carrier protein dehydratase    |
| P239 | (3R)-hydroxymyristoyl-[acyl-carrier-protein] dehydratase  |
| P240 | Voltage-dependent L-type calcium channel subunit alpha-1D |
| P241 | Nicotinic acid receptor 2                                 |
| P242 | Neopullulanase 1                                          |
| P243 | Mineralocorticoid receptor                                |
| P244 | Mast/stem cell growth factor receptor                     |
| P245 | Hypoxia-inducible factor 1 alpha                          |
| P246 | Histamine H2 receptor                                     |
| P247 | Glucosylceramidase                                        |
| P248 | Glutamate [NMDA] receptor subunit epsilon-1               |
| P249 | Glutamate [NMDA] receptor subunit epsilon-2               |
| P250 | Epidermal growth factor receptor                          |
| P251 | Epididymal-specific lipocalin-9                           |
| P253 | Cell division protein kinase 6                            |
| P254 | Carboxypeptidase A1                                       |
| P255 | Beta-3 adrenergic receptor                                |
| P256 | Alpha-mannosidase 2                                       |
| P257 | Amiloride-sensitive sodium channel subunit alpha          |
| P258 | Acetyl-CoA carboxylase 2                                  |
| P259 | 5-hydroxytryptamine 1F receptor                           |

---

\* Targets associate with cardiovascular disease
